# Supplementary material
Source: publisher figshare collection journal article supplement (https://gsajournals.figshare.com/ndownloader/files/28534137)
Supplement: Supplementary file 1 [file 28534137]

## Sheet: Sheet1
	maternal	zygotic	maternal/zygotic	N/A	Total	% zyg genes
clampi1	663	490	83	1300	2536	46.3592
zldi	637	680	60	722	2099	53.74
clampi2x	683	744	67	868	2362	54.2838
zld/clampi1	888	1119	126	1488	3621	58.3685
